# Supplementary material for: A Dynamic Simulation Model for Understanding Sustainability of Machining Operation
Source: MDPI journal article supplement (doi:10.3390/su15010152), 2022-12-22
Supplement: s1 [file s1]

Article

# A Dynamic Simulation Model for Understanding Sustainability of Machining Operation

Tess Moran, Rod MacDonald and Hao Zhang \*

School of Integrated Sciences, James Madison University, Harrisonburg, 22807, USA

\* Correspondence: zhang9hx@jmu.edu

## Model Variable and Equations.

|                             | Equation                                                                                                                                         | Properties                     | Units                            |
|-----------------------------|--------------------------------------------------------------------------------------------------------------------------------------------------|--------------------------------|----------------------------------|
| Top-Level Model:            |                                                                                                                                                  |                                |                                  |
| Average_Roughness(t)        | $Average\_Roughness(t - dt) + (Net\_Change\_in\_Quality) * dt$                                                                                   | INIT Average_Roughness = 85    | roughness                        |
| Cost(t)                     | $Cost(t - dt) + (Cost\_Accumulation) * dt$                                                                                                       | INIT Cost = 0                  | dollars                          |
| Energy(t)                   | $Energy(t - dt) + (Accumulation\_of\_Energy) * dt$                                                                                               | INIT Energy = 0                | kW*h                             |
| Environmental_Impacts(t)    | $Environmental\_Impacts(t - dt) + (Impact\_Accumulation) * dt$                                                                                   | INIT Environmental_Impacts = 0 | kg CO2e                          |
| Tool_Wear(t)                | $Tool\_Wear(t - dt) + (tool\_wear\_rate - Tool\_replacement) * dt$                                                                               | INIT Tool_Wear = 0.01          | One thousands of an inch         |
| Accumulation_of_Energy      | Cutting_Power/Adjustment_time                                                                                                                    |                                | kW*h/Minutes                     |
| Cost_Accumulation           | $((Cost\_of\_Tools + Cost\_of\_Energy + Cost\_of\_Material)) / 100$                                                                              |                                | dollars/minutes                  |
| Impact_Accumulation         | $Environmental\_Impact\_Converter\_For\_Tools + Environmental\_Impact\_Converter\_For\_Material + Environmental\_Impact\_Converter\_for\_Energy$ |                                | kg CO2e/minutes                  |
| Net_Change_in_Quality       | $(Surface\_Finish\_Roughness - Average\_Roughness) / Adjustment\_Time\_for\_Quality$                                                             |                                | roughness/Minutes                |
| Tool_replacement            | IF<br>$(Ratio\_of\_Tool\_Wear\_to\_Tolerance\_Standard > 1) THEN (Tool\_Wear) ELSE (0)$                                                          |                                | One thousands of an inch/Minutes |
| tool_wear_rate              | Tool_Replacement_On_Wear_Rate*Tool_life                                                                                                          |                                | One thousands of an inch/Minutes |
| Adjustment_time             | 1                                                                                                                                                |                                | Minutes                          |
| Adjustment_Time_for_Quality | 50                                                                                                                                               |                                | Minutes                          |
| B1                          | LOOPSCORE(tool_wear_rate, Tool_Wear, Ratio_of_Tool_Units, Effect_of_Newness_on_Tool_Wear, Tool_life)                                             |                                | dmnl                             |
| B2                          | LOOPSCORE(Tool_replacement, Tool_Wear, Ratio_of_Tool_Wear_to_Tolerance_Standard)                                                                 |                                | dmnl                             |
| B3                          | LOOPSCORE(tool_wear_rate, Tool_Wear, Ratio_of_Tool_Wear_to_Tolerance_Standard, Tool_Replacement_On_Wear_Rate)                                    |                                | dmnl                             |
| B4                          | LOOPSCORE(Tool_replacement, Tool_Wear)                                                                                                           |                                | dmnl                             |

|                                              |                                                                                                                                                                                                                                                                                   |                                      |
|----------------------------------------------|-----------------------------------------------------------------------------------------------------------------------------------------------------------------------------------------------------------------------------------------------------------------------------------|--------------------------------------|
|                                              |                                                                                                                                                                                                                                                                                   |                                      |
| "C_value_(Wear_Per_Cutting_Speed)"           | .0033 {1368.7}                                                                                                                                                                                                                                                                    | One thousands of an inch/Revolutions |
| Cost_Accumulation_per_processing_time        | Cost_Accumulation/Processing_Time                                                                                                                                                                                                                                                 | dollars/unit                         |
| Cost_of_Energy                               | Accumulation_of_Energy*Price_per_kWh                                                                                                                                                                                                                                              | dollars/minutes                      |
| Cost_of_Material                             | Material_Removal_Rate*"Price_per_in^3_steel"                                                                                                                                                                                                                                      | dollars/minutes                      |
| Cost_of_Tools                                | IF(Tool_replacement>124)THEN(Cost_per_Tool)ELSE(0)                                                                                                                                                                                                                                | dollars/minutes                      |
| Cost_per_Tool                                | 15                                                                                                                                                                                                                                                                                | dollars/tool                         |
| Cutting_Length                               | 12                                                                                                                                                                                                                                                                                | Inches/unit                          |
| Cutting_Power                                | Cutting_Speed_to_Power_Relationship/"min/hr"                                                                                                                                                                                                                                      | kW*h                                 |
| Cutting_Speed_to_Power_Relationship          | GRAPH(RPM*"RPM_to_m/min") Points: (0.01, 0.0), (0.5, 0.02), (0.75, 0.03), (1, 0.04), (1.5, 0.05), (2, 0.07), (5, 0.18), (20, 0.7), (50, 1.76), (100, 3.52), (200, 7.04), (500, 17.61), (1000, 35.22), (1500, 52.84), (2000, 70.45), (2500, 88.06), (3000, 105.67), (3500, 123.29) | kW/Minutes                           |
| density_of_carbide_tool                      | 0.25613                                                                                                                                                                                                                                                                           | kg carbide/in^3                      |
| density_of_steel                             | 0.12862                                                                                                                                                                                                                                                                           | kg steel/in^3                        |
| Depth_of_Cut                                 | 0.236                                                                                                                                                                                                                                                                             | Inches                               |
| Effect_of_Newness_on_Tool_Wear               | GRAPH(Ratio_of_Tool_Units) Points: (0.000, 2.500), (0.100, 1.500), (0.200, 1.000), (0.300, 1.000), (0.400, 1.000), (0.500, 1.000), (0.600, 1.000), (0.700, 1.000), (0.800, 1.000), (0.900, 1.000), (1.000, 1.000)                                                                 | Dimensionless                        |
| Effect_of_Ratio_of_Surface_Quality_to_Normal | GRAPH(Ratio_of_Surface_Quality_to_Normal) Points: (0.00, 1.000), (1.00, 1.000), (2.00, 1.000), (3.00, 1.100), (4.00, 1.200), (5.00, 1.300), (6.00, 1.500), (7.00, 1.600), (8.00, 1.900), (9.00, 2.200), (10.00, 2.400)                                                            | Dimensionless                        |
| Effect_of_Tool_Wear_to_Tolerance_Standard    | GRAPH(Ratio_of_Tool_Wear_to_Normal_Tool_Replacement) Points: (0.000, 1.00), (0.100, 1.00), (0.200, 1.00), (0.300, 1.00), (0.400, 1.00), (0.500, 2.06), (0.600, 3.09), (0.700, 4.36), (0.800, 4.64), (0.900, 4.91), (1.000, 9.96)                                                  | Dimensionless                        |
| Environmental_Impact_Converter_for_Energy    | Impact_Factor_for_Energy*Accumulation_of_Energy                                                                                                                                                                                                                                   | kg CO2e/minutes                      |
| Environmental_Impact_Converter_For_Material  | Material_Removal_Rate*density_of_steel*Impact_Factor_For_Steel                                                                                                                                                                                                                    | kg CO2e/minutes                      |
| Environmental_Impact_Converter_For_Tools     | Volume*density_of_carbide_tool*Impact_Factor_for_Carbide_Tool                                                                                                                                                                                                                     | kg CO2e/minutes                      |
| Feed                                         | 0.0017                                                                                                                                                                                                                                                                            | inches/revolutions/edges             |
| Feed_Rate                                    | Number_of_Cutting_Edges*Feed*RPM                                                                                                                                                                                                                                                  | inches/minutes                       |
| Impact_Factor_for_Carbide_Tool               | 69                                                                                                                                                                                                                                                                                | kg CO2e/kg carbide                   |
| Impact_Factor_for_Energy                     | 7090                                                                                                                                                                                                                                                                              | kg CO2e/kW*h                         |

|                                               |                                                                                                                               |                                  |
|-----------------------------------------------|-------------------------------------------------------------------------------------------------------------------------------|----------------------------------|
|                                               |                                                                                                                               |                                  |
| Impact_Factor_For_Steel                       | 2.1                                                                                                                           | kg CO2e/kg steel                 |
| Initial_Tool_Replacement_Standard             | 250                                                                                                                           | One thousands of an inch         |
| Material_Removal_Rate                         | Depth_of_Cut*Width_of_Cut*Feed_Rate                                                                                           | in^3/minutes                     |
| "min/hr"                                      | 60                                                                                                                            | h/Minutes                        |
| n_value                                       | 1                                                                                                                             | Dimensionless                    |
| Normal_Cutting_Speed                          | 3000                                                                                                                          | Revolutions/Minutes              |
| Normal_Smoothness_of_Surface                  | 32                                                                                                                            | roughness                        |
| Normal_Tool_Replacement                       | 250                                                                                                                           |                                  |
| Number_of_Cutting_Edges                       | 4                                                                                                                             | edges                            |
| Number_of_Products_Made                       | 1/Processing_Time                                                                                                             | unit/minutes                     |
| Policy_Test_for_Tool_Replacement              | 0                                                                                                                             | Dimensionless                    |
| Policy_Time_Step                              | 25                                                                                                                            | minutes                          |
| "Price_per_in^3_steel"                        | 1.28                                                                                                                          | dollars/in^3                     |
| Price_per_kWh                                 | 0.00672                                                                                                                       | dollars/kW*h                     |
| Processing_Time                               | Cutting_Length/Feed_Rate                                                                                                      | Minutes/unit                     |
| Ratio_of_Cost_to_Roughness                    | Cost/Average_Roughness                                                                                                        | dollars/roughnesses              |
| Ratio_of_Surface_Quality_to_Normal            | Surface_Finish_Roughness/Normal_Smoothness_of_Surface                                                                         | Dimensionless                    |
| Ratio_of_Tool_Units                           | Tool_Wear/Tool_replacement_standard                                                                                           | Dimensionless                    |
| Ratio_of_Tool_Wear_to_Normal_Tool_Replacement | Tool_Wear/Normal_Tool_Replacement                                                                                             | Dimensionless                    |
| Ratio_of_Tool_Wear_to_Tolerance_Standard      | Tool_Wear/Tool_replacement_standard                                                                                           | Dimensionless                    |
| RPM                                           | {250-0.5*Surface_Finish_Quality}<br>Normal_Cutting_Speed*Effect_of_Ratio_of_SF_to_Normal                                      | Revolutions/Minutes              |
| "RPM_to_m/min"                                | 0.019939                                                                                                                      | kW/Revolutions                   |
| Surface_Finish_Roughness                      | {128.18-(0.016*Tool_Wear)}<br>Normal_Smoothness_of_Surface*Effect_of_Tool_Wear_to_Tolerance_Standard                          | roughness                        |
| Tool_life                                     | {((Cutting_Speed/C_value)^(1/n_value))+Modifier}(RPM*n_value*C_value*(Wear_Per_Cutting_Speed))*Effect_of_Newness_on_Tool_Wear | One thousands of an inch/Minutes |
| Tool_Replacement_On_Wear_Rate                 | IF<br>(Ratio_of_Tool_Wear_to_Tolerance_Standard >= 1) THEN (0) ELSE (1)                                                       | Dimensionless                    |
| Tool_replacement_standard                     | Initial_Tool_Replacement_Standard*(1+STEP(Policy_Test_for_Tool_Replacement, Policy_Time_Step))                                | One thousands of an inch         |
| U1                                            | LOOPSCORE(tool_wear_rate,Tool_Wear,Ratio_of_Tool_Wear_to_Tolerance_Standard,Effect_                                           | dmnl                             |

|                 |                                                                                                                                                |                  |
|-----------------|------------------------------------------------------------------------------------------------------------------------------------------------|------------------|
|                 | of_Tool_Wear_to_Tolerance_Standard,Surface_Finish_Roughness,Ratio_of_Surface_Quality_to_Normal,Effect_of_Ratio_of_SQF_to_Normal,RPM,Tool_life) |                  |
| Volume          | IF(Tool_replacement>222)THEN(Volume_per_Tool)ELSE(0)                                                                                           | inches^3/minutes |
| Volume_per_Tool | 0.0982                                                                                                                                         | inches^3/minutes |
| Width_of_Cut    | 0.25                                                                                                                                           | inches           |

| Run Specs                            |         |
|--------------------------------------|---------|
| Start Time                           | 0       |
| Stop Time                            | 240     |
| DT                                   | 1/1     |
| Fractional DT                        | True    |
| Save Interval                        | 1       |
| Sim Duration                         | 1.5     |
| Time Units                           | Minutes |
| Pause Interval                       | 0       |
| Integration Method                   | Euler   |
| Keep all variable results            | True    |
| Run By                               | Run     |
| Calculate loop dominance information | True    |
| Exhaustive Search Threshold          | 1000    |
